1 **Investigating the role of N-terminal domain in phosphodiesterase**  
2 **4B-inhibition by molecular dynamics simulation**

3  
4 Vidushi Sharma<sup>1\*</sup>, Sharad Wakode<sup>1\*</sup>

5 *<sup>1</sup>Department of Pharmaceutical Chemistry, Delhi Institute of Pharmaceutical Sciences*  
6 *& Research, Mehrauli-Badarpur Road, Pushp vihar Sector 3 New Delhi 110017, India*

7  
8  
9

10  
11

12 \*Corresponding Author:

13 Vidushi Sharma

14 Email id: [vidushimaitry@gmail.com](mailto:vidushimaitry@gmail.com)

15 Contact no: +1-978-340-1547

16 Sharad Wakode

17 Email id: [sharadwakode@gmail.com](mailto:sharadwakode@gmail.com)

18 Contact no: +91-9891008594

19  
20

21  
22

23  
24

25  
26

27  
28

29

30 **Keywords**

Phosphodiesterase 4B, UCR2, Molecular dynamics simulation, Principal component analysis, Distance cross correlation matrix

31 **Abstract**

32 Phosphodiesterase 4B (PDE4B) is a potential therapeutic target for the inflammatory  
33 respiratory diseases such as congestive obstructive pulmonary disease (COPD) and  
34 asthma. The sequence identity of ~88% with its isoform PDE4D is the key barrier in  
35 developing selective PDE4B inhibitors which may help to overcome associated side  
36 effects. Despite high sequence identity, both isoforms differ in few residues present in  
37 N-terminal (UCR2) and C-terminal (CR3) involved in catalytic site formation.  
38 Previously, we designed and tested specific PDE4B inhibitors considering N-terminal  
39 residues as a part of the catalytic cavity. In continuation, current work thoroughly  
40 presents an MD simulation-based analysis of N-terminal residues and their role in  
41 ligand binding. The various parameters viz. root mean square deviation (RMSD),  
42 radius of gyration (Rg), root mean square fluctuation (RMSF), principal component  
43 analysis (PCA), *dynamical cross-correlation matrix (DCCM)* analysis, secondary  
44 structure analysis, and residue interaction mapping were investigated to establish  
45 rational. Results showed that UCR2 reduced RMSF values for the metal binding  
46 pocket ( $31.5 \pm 11$  to  $13.12 \pm 6$  Å<sup>2</sup>) and the substrate-binding pocket ( $38.8 \pm 32$  to  $17.3 \pm 11$   
47 Å<sup>2</sup>). UCR2 enhanced anti-correlated motion at the active site region that led to the  
48 improved ligand-binding affinity of PDE4B from  $-24.57 \pm 3$  to  $-35.54 \pm 2$  kcal/mol. Further,  
49 the atomic-level analysis indicated that T- $\pi$  and  $\pi$ - $\pi$  interactions between inhibitors  
50 and residues are vital forces that regulate inhibitor association to PDE4B with high  
51 affinity. In conclusion, UCR2, the N-terminal domain, embraces the dynamics of  
52 PDE4B active site and stabilizes PDE4B inhibitor interactions. Therefore the N-  
53 terminal domain needs to be included by designing next-generation, selective PDE4B-  
54 inhibitors as potential anti-inflammatory drugs.

## 55 1. Introduction

56 Respiratory inflammatory diseases such as congestive obstructive pulmonary disease  
57 (COPD) and asthma affect millions worldwide (Zhang, Ibrahim, Gillette & Bollag 2005).  
58 Phosphodiesterase 4B (PDE4B) is a potential therapeutic target in inflammatory  
59 diseases. It hydrolyzes cyclic adenosine monophosphate (cAMP), an important  
60 secondary messenger, to 5'-adenosine monophosphates (AMP). AMP is a potent pro-  
61 inflammatory mediator in humans, and thus PDE4B regulates many biological  
62 processes inside the cell by regulating the production of AMP (Houslay & Adams  
63 2003). Therefore, PDE4B inhibitors that prevent cAMP hydrolysis are much needed.  
64 The PDE4 enzyme family consists of four members (named PDE4A, PDE4B, PDE4C,  
65 and PDE4D), and the mechanism of cAMP catabolism is conserved among all the four  
66 PDE4 enzymes. These PDE4 enzymes are highly expressed in neutrophils,  
67 monocytes, central nervous system, and smooth muscles of the lung. Available non-  
68 selective PDE4 inhibitors like rolipram cause severe side effects such as nausea and  
69 emesis. As an improvement, the second-generation PDE4 inhibitors like roflumilast  
70 show fewer side effects; however, they are associated with a narrow therapeutic  
71 window. Knockout studies in mice suggest that available PDE4B inhibitors co-inhibit  
72 PDE4D, a close homologous enzyme, thus causing  
73 severe side effects (Wang et al. 1997; Calverley et al. 2009). Therefore, selective  
74 inhibition of PDE4B is much needed to develop safe anti-inflammatory drugs.  
75 Nonetheless, the high sequence (and thus structural) similarity between the two  
76 enzymes, PDE4B and PDE4D, sets hurdles to design and develop selective PDE4B  
77 inhibitors.

78  
79 The structural comparison of the two enzymes, PDE4B and PDE4D, reveals that the  
80 active site cavity is composed of residues from the catalytic domain and a regulatory  
81 domain. These regulatory domains include the N-terminal, upstream conserved region  
82 2 (UCR2) domain, and the C-terminal regulatory domain (Rocque et al. 1997). Either  
83 of these two regulatory domains can cover the catalytic cavity, and thus, provide  
84 selectivity for PDE4B inhibition. Contrary to the role of UCR2 in PDE4B inhibition, the  
85 UCR2 domain does not affect the substrate affinity ( $K_m$ ) of PDE4B, as shown by  
86 similar  $K_m$  values for the 'long-', and the 'catalytic-' versions of PDE4B (Saldou et al.  
87 1998). In this work, we have focused on studying the structural effect of the regulatory

88 N-terminal domain, UCR2, on PDE4B inhibition. While a catalytic domain is  
89 conserved, with an RMSD value of 0.352 (C $\alpha$  atoms; PDE4B:PDE4D::3G45:3G4G),  
90 between the two enzymes, the UCR2 domain shows following distinct residues that  
91 cover the active site region: PDE4B:PDE4D::Tyr274:Phe196 (Rocque et al. 1997).  
92 Burgin *et al.* have established that Tyr274 indeed provides selectivity for inhibition of  
93 PDE4B. Although, other groups and we have reported selective PDE4B inhibitors, and  
94 evaluated the energetics of PDE4B inhibition (Goto et al. 2014; Li et al. 2016; Sharma  
95 & Wakode 2017; Xing, Akowuah, Gautam & Gaurav 2017), yet, the structural  
96 dynamics of PDE4B inhibition was merely understood. Understanding the dynamics  
97 of UCR2-domain guided PDE4B inhibition will guide us to design and optimize  
98 available PDE4B inhibitors. Literature supports that similar MD simulation studies can  
99 successfully be implemented to understand the mechanisms of molecular recognition  
100 and conformational changes in therapeutic targets (Padhi, Kumar, Vasaikar, Jayaram  
101 & Gomes 2012; Sharma & Wakode 2016; Moreau et al. 2017; Santos et al. 2017;  
102 Douglas et al. 2018; Elfiky 2020; Islam et al. 2020; Kumar et al. 2020). In this work,  
103 we performed a comparative all-atom molecular dynamics simulation study of PDE4B-  
104 inhibitor complex and explored the effect of UCR2-domain residues in PDE4B  
105 inhibition. In 100ns long MD simulations, we performed principal component analysis  
106 (PCA), dynamical cross-correlation matrix (DCCM) analysis, secondary structure  
107 analysis, and residue network mapping to shed light on the fact that the N-terminal  
108 UCR2 domain improves non-polar interactions at PDE4B-inhibitor interface.  
109 Therefore, these UCR2 domain residues must be targeted to optimize PDE4B  
110 inhibitors (Tautermann, Seeliger & Kriegl 2015; Xiao, Yang, Xu & Vongsangnak 2015).  
111

## 112 **2. Experimental**

### 113 **2.1 Data selection**

114 The highest resolution PDE4B crystal structure [PDB ID-2QYL inhibitor-NPV (4-[8-(3-  
115 nitrophenyl)-1,7-naphthyridin-6-yl] benzoic acid) resolution: 1.95 Å] was retrieved  
116 from the protein data(Berman et al. 2000). To study the role of the N-terminal UCR2  
117 domain, we retrieved another PDE4B structure (PDB ID: 3G45, inhibitor: NPV, 8-(3-  
118 nitrophenyl)-6-(pyridin-4-ylmethyl)quinoline and resolution: 2.63 Å). Here onward,  
119 these complex structures will be denoted as “**U-Cat**” (structure with **U**CR2+**Cat**alytic  
120 domain; PDB ID: 3G45) and “**Cat**” (structure with only **cat**alytic domain; PDB ID:  
121 2QYL). To understand the role of UCR-2 residues in PDE4B-inhibitor interactions,

122 we used a common inhibitor, NPV, in both the structures and replaced the  
123 coordinates of 988, a co-crystallized ligand, with NPV in the 3G45 structure.

124

## 125 **2.2 Protein Preparation**

126 Previously retrieved structures may have missing bond order, connectivity, steric  
127 clashes or bad contacts with the neighboring residues. Therefore, both the structures  
128 were prepared using Protein Preparation Wizard (Impact 6.3, Schrodinger 2014-2,  
129 Maestro 9.8) (Sastry, Adzhigirey, Day, Annabhimoju & Sherman 2013) as previously  
130 described (Sharma & Wakode 2016). In brief, both the structures were corrected for  
131 atoms and bonds, and energy minimized to potentially relax the structures to get rid of  
132 any steric clashes in the structures.

133

## 134 **2.3 Molecular Dynamic Simulations**

135 FF14SB force field parameters were set for the protein using the AMBER14 (Assisted  
136 Model Building with Energy Refinement) LeaP module (Hornak et al. 2006). AM1-BCC  
137 method was used to assign partial atomic charges for bound inhibitor (NPV), and the  
138 general amber force field (GAFF) was used to create its topology (Wang, Wolf,  
139 Caldwell, Kollman & Case 2004). Mg<sup>2+</sup> and Zn<sup>2+</sup> ions were treated according to the  
140 “non-bonded” model method (Stote & Karplus 1995). The prepared systems were  
141 solvated with the TIP3P water model by creating a cubic water box, where the distance  
142 of the box was set to 10Å from the periphery of protein (Kiss & Baranyai 2011).  
143 Molecular systems were neutralized through the AMBER LeaP module by adding the  
144 necessary amount of counter ions (Na<sup>+</sup>) to construct the system in an electrostatically  
145 preferred position.

146 The whole assembly was then saved as the prepared topology and coordinate files to  
147 use as input for the PMEMD module of the AMBER (Case et al. 2005). At the first step,  
148 the prepared systems were energy minimized in a two-step process: initial 1000 steps  
149 of steepest descent followed by 500 steps conjugate gradient. In the first part of  
150 minimization, the complex was kept fixed to allow water and ion molecules to move,  
151 followed by the minimization of the whole system (water, ions and complex) in the  
152 second part. The minimized systems were gradually heated from 0 to 298 K using a  
153 NVT ensemble for 100ps where the protein-ligand complex was restrained with a large  
154 force constant of 5 kcal/mol/Å<sup>2</sup>. Following heating, the systems were equilibrated

155 under constant pressure at 298 K, and the restrain was gradually removed at NPT  
156 ensemble as follows: 5 kcal/mol/Å<sup>2</sup> (40 ps), 2 kcal/mol/Å<sup>2</sup> (20 ps), 1 kcal/mol/Å<sup>2</sup> (20 ps)  
157 and 0.5 kcal/mol/Å<sup>2</sup> (10 ps). Final simulations, the production run, were performed for  
158 100 ns on NPT ensemble at 298 K temperature and 1 atm pressure. The step size of  
159 2 fs was kept for whole simulation study. Langevin thermostat and barostat were used  
160 for temperature and pressure coupling. SHAKE algorithm was applied to constrain all  
161 bonds containing hydrogen atoms (Gunsteren & Berendsen 2006). The non-bonded  
162 cutoff was kept on 10Å, and long-range electrostatic interactions were treated by  
163 Particle Mesh Ewald method (PME) with a fast Fourier transform grid spacing of  
164 approximately 0.1nm (Darden, York & Pedersen 1993). Trajectory snapshots were  
165 taken at each 100ps, which were used for final analysis. The minimization and  
166 equilibration were performed by the PMEMD module of AMBER14. The production  
167 simulations were performed using the PMEMD program of AMBER running on NVIDIA  
168 Tesla C2050 GPU work station (Gotz et al. 2012). The production run was considered  
169 for the analysis which was carried out using the cpptraj module of the AMBER14 and  
170 VMD (Humphrey, Dalke & Schulten 1996)

#### 171 **2.4 RMSD**

172 The stability of the two systems during the simulations was studied by calculating  
173 RMSD of the backbone atoms of different frames to the initial conformation and  
174 therefore, RMSD is the measure of the average distance between the atoms (usually  
175 the backbone atoms) of superimposed protein structures. RMSD of C $\alpha$  atoms was  
176 calculated using the cpptraj analysis tool in the AMBER 14 program.

177

#### 178 **2.5 Rg**

179 The radius of gyration is a measure of the distance between the center of mass and  
180 both termini of the protein and therefore radius of gyration determines the  
181 compactness of protein structure (Lobanov, Bogatyreva & Galzitskaia 2008). The  
182 average Rg was computed by taking the average of C $\alpha$  atoms over at least 5000  
183 frames of the trajectories.

#### 184 **2.6 RMSF**

185 RMSFs were calculated with the backbone atoms of amino acid residues for both the  
186 trajectories using the cpptraj module of AMBER 14. The starting conformations of each  
187 complex structure were used to align the coordinates of the two trajectories.

188

## 189 **2.7 DCCM**

190 The cross-correlation was calculated as block average over time from 50 ns to 100 ns  
191 from the MD trajectories of the two systems, U-Cat and Cat. We use the first coordinate  
192 set of the analysis portion of the simulation, *i.e.*, starting structure as a reference set.  
193 Each subsequent coordinate set was translated and then rotated to obtain the  
194 minimum RMS deviation of the C $\alpha$  atoms from the reference coordinate set  
195 (McCammon & Harvey 1988).

196

## 197 **2.8 PCA**

198 PCA was performed using the cpptraj module of AMBER 14 to understand the  
199 collective atomic motion of U-Cat and Cat versions of PDE4B. Atomic coordinates  
200 extracted from the last 50 ns trajectories to study the covariance matrix of the two  
201 systems. The eigenvalues and the projections along the first three PCs were  
202 calculated as previously described (Amir et al. 2019; Fatima et al. 2019).

203

## 204 **2.9 Protein secondary structure analysis**

205 In the dynamic analysis, it is imperative to identify critical changes in the secondary  
206 structure element during the simulation. It imparts deep insight into the stability of the  
207 secondary structure. Each secondary structure type is shown by a different color, and  
208 a change in secondary structure type is easily differentiated. The secondary structure  
209 information for each frame was calculated, and a two-dimensional plot was generated  
210 for the last 50 ns trajectory, 500 frames.

211

## 212 **2.10 Residue network mapping**

213 The study of residue interacting patterns is imperative to analyze protein's structural  
214 rigidity, secondary structure maintenance, and functionality. It includes crucial  
215 interactions, hydrogen bond occupancies that are present during the simulation. These  
216 interactions are identified using VMD. The hydrogen bond interaction was calculated  
217 between the polar hydrogen atom and a nearby ( $< 3.4$  Å) acceptor atom. Similarly, the

218  $\pi$  - $\pi$  interactions were calculated in the crystal structure and MD-simulated structure  
219 of the last 100th ns. The  $\pi$  - $\pi$  interactions results with the attraction of one  $\pi$  electron  
220 cloud system with another nearby  $\pi$  electron cloud system. These interactions are  
221 crucial in bioprocesses. In this study, we measure the inter-residue distance to each  
222 hydrophobic ring centroid to identify the pair of  $\pi$  - $\pi$  interacting residues. The residue  
223 pairs within a ring centroid distance of 3.0–7.5 Å (min-max) were considered. Further,  
224 we calculated the dihedral angle ( $\theta$ ) between the two planes that have two types of  
225 structural geometries. If the dihedral angle between the planes of two rings was found  
226 to be  $30^\circ > \theta > 150^\circ$ , the rings are in face-to-face interaction and if the angle is between  
227  $30^\circ < \theta < 150^\circ$ , the rings are in T-shaped (edge to face or perpendicular) interactions  
228 (Anjana et al. 2012).

229

### 230 **3. Result and discussion**

231 The objective of our study was to understand the role of N-terminal UCR2-domain  
232 residues in the stability of PDE4B-inhibitor complexes. To this end, we performed all-  
233 atom molecular dynamics simulations of PDE4B-NPN complex in the presence (**U-**  
234 **Cat**) and absence of the UCR2-domain residues (**Cat**). First, we confirmed the stability  
235 of two systems by RMSD analysis and total energy calculations. Next, the stable MD  
236 trajectories were processed to understand the dynamics of PDE4B-NPV interactions  
237 through RMSF analysis, DCCM analysis, and PCA. Lastly, we analyzed residue  
238 network mapping.

239

#### 240 **3.1 Systems stability**

241 The reliability of our MD simulations was assessed in terms of RMSD values, total  
242 energies, and radius of gyration  $R_g$  of the two simulations as follows:

243

##### 244 **3.1.1 RMSD**

245 RMSD analysis accounts for the average distance between the selected atoms of  
246 superimposed biomolecules, which indicates the closeness between the three-  
247 dimensional structures. In this study, we calculated the RMSD values for the backbone  
248 atoms for the proteins and all non-hydrogen atoms for the small molecule, NPV. Within  
249 the initial 5-ns of each simulation, both the systems became stable and remained  
250 stable throughout the 100ns long MD simulations (**Fig. 1**). During the last 50 ns long  
251 simulations, the RMSD values of catalytic domain residues (Ser324-Pro665) were as



252 follows:  $1.28 \pm 0.12 \text{ \AA}$  (**Cat**) and  $1.11 \pm 0.09 \text{ \AA}$  (**U-Cat**). The lower magnitude of these  
253 values suggests the stability of both the systems. Further, the difference between  
254 these values for both the systems (**U-Cat** versus **Cat** complexes) is insignificant (t-  
255 test). This finding suggests that the additional N-terminal, UCR2-domain does not  
256 affect the major dynamics of the catalytic domain of the protein.

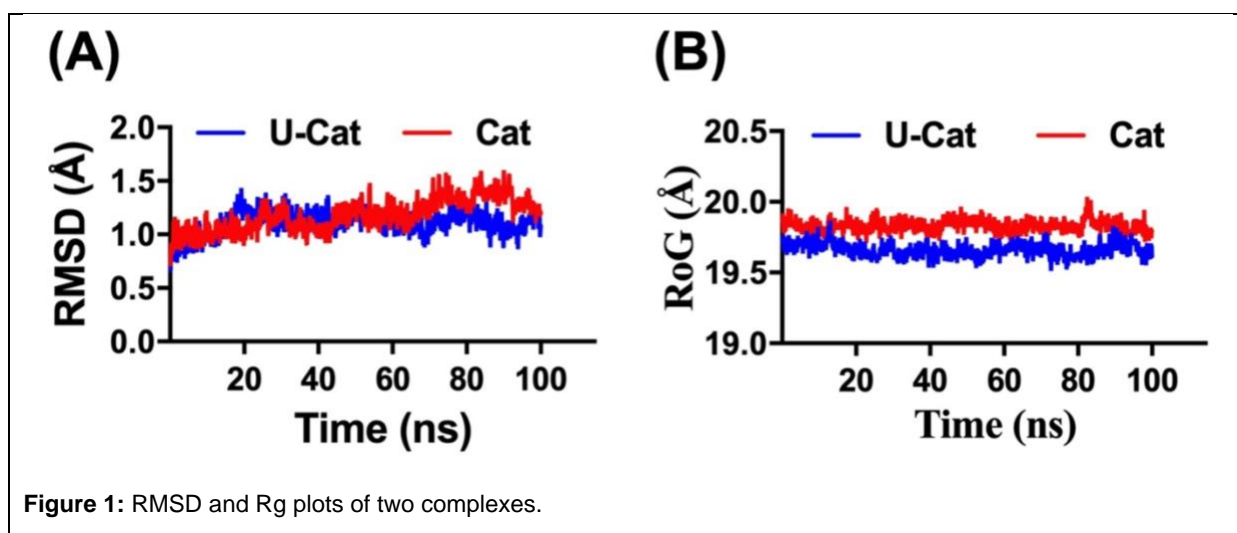

257  
258 Similar to RMSD values for the catalytic domain, the RMSD values for the bound  
259 inhibitor, NPV, are also low ( $<1.5 \text{ \AA}$ ), suggesting the stable dynamics of the two  
260 systems. The RMSD values for the two systems during the last 50 ns duration are as  
261 follows:  $1.16 \pm 0.07 \text{ \AA}$  (**Cat**) and  $0.86 \pm 0.26 \text{ \AA}$  (**U-Cat**). The lower RMSD values for the  
262 **U-Cat** system suggest that additional UCR2-domain stabilizes the bound inhibitor.

263

### 264 3.1.2 Rg

265 Rg measures the mass-weighted RMS distance of a group of atoms from their  
266 common center of mass, which indicates the global dimension of the protein. For both  
267 the systems (**Cat** and **U-Cat**), we calculated the Rg for the catalytic domain residues  
268 (Ser324-Pro658) and observed a stable trend in Rg plot. The Rg values for the last 50  
269 ns simulations for the two systems were as follows:  $19.66 \pm 0.05$  (**U-Cat** system) and  
270  $19.78 \pm 0.05$  (**Cat** system) (**Fig. 1B**).

271

272 **3.2 Structural dynamics of PDE4B-NPN complex in the presence (U-Cat) and**  
273 **absence (Cat) of UCR2-domain**

274 Once we confirmed the stability of the two systems, next we sought to study the  
275 conformational changes in the two complexes (**Cat** and **U-Cat**) and performed the  
276 following analyses:

277

### 278 3.2.1 RMSF

279 To understand and compare the dynamics of the two complexes, we calculated the  
280 RMSF values for each complex. Using RMSF analysis, we studied the fluctuation at  
281 the individual residue level in the two systems. To compare the two systems, we  
282 rejected the additional N-terminal residues in **the U-Cat** structure and focussed on the  
283 catalytic domain residues in the two complex structures. The comparative RMSF plot  
284 of the two systems is shown in **Fig. 2**. A similar trend in RMSF values suggested that  
285 the UCR2-domain had no drastic effect on the conformational dynamics of the two  
286 systems.

287

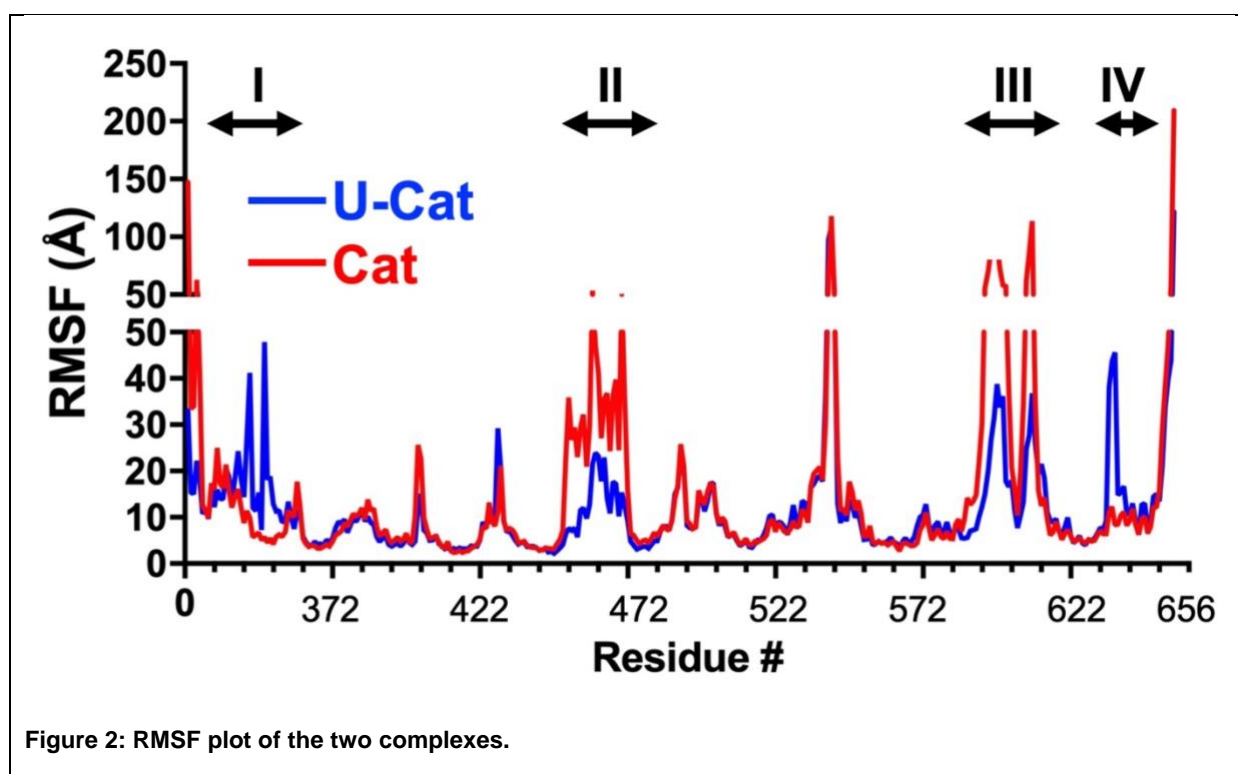

288

289 Intriguingly, we observed the distinct behaviors of the two complexes, **U-Cat** and **Cat**,  
290 in following four regions: Asp336-Asn354 (region I; 19 residues), Pro451-Glu472  
291 (region II; 22 residues), Phe587-Ser614 (region III; 28 residues) and Gln635-Asp643  
292 (region IV; 13 residues). Interestingly, region II residues belong to the metal-binding  
293 pocket such as His450, Asn283, Glu476. The catalytic residue, Gln615, and the P

294 clamp pocket (Met583, Met603, and Val611) belong to region III. Region I and IV are  
295 distant from the active site region and do not include any catalytic or functional residue.  
296 Among these regions, the presence of additional UCR2-domain residues stabilized  
297 the region II and III in the **U-Cat** complex, which was reflected in lower RMSF values  
298 as compared to **Cat** complex. In contrast, the **region I** and **IV** showed higher RMSF  
299 values for the **U-Cat** complex.

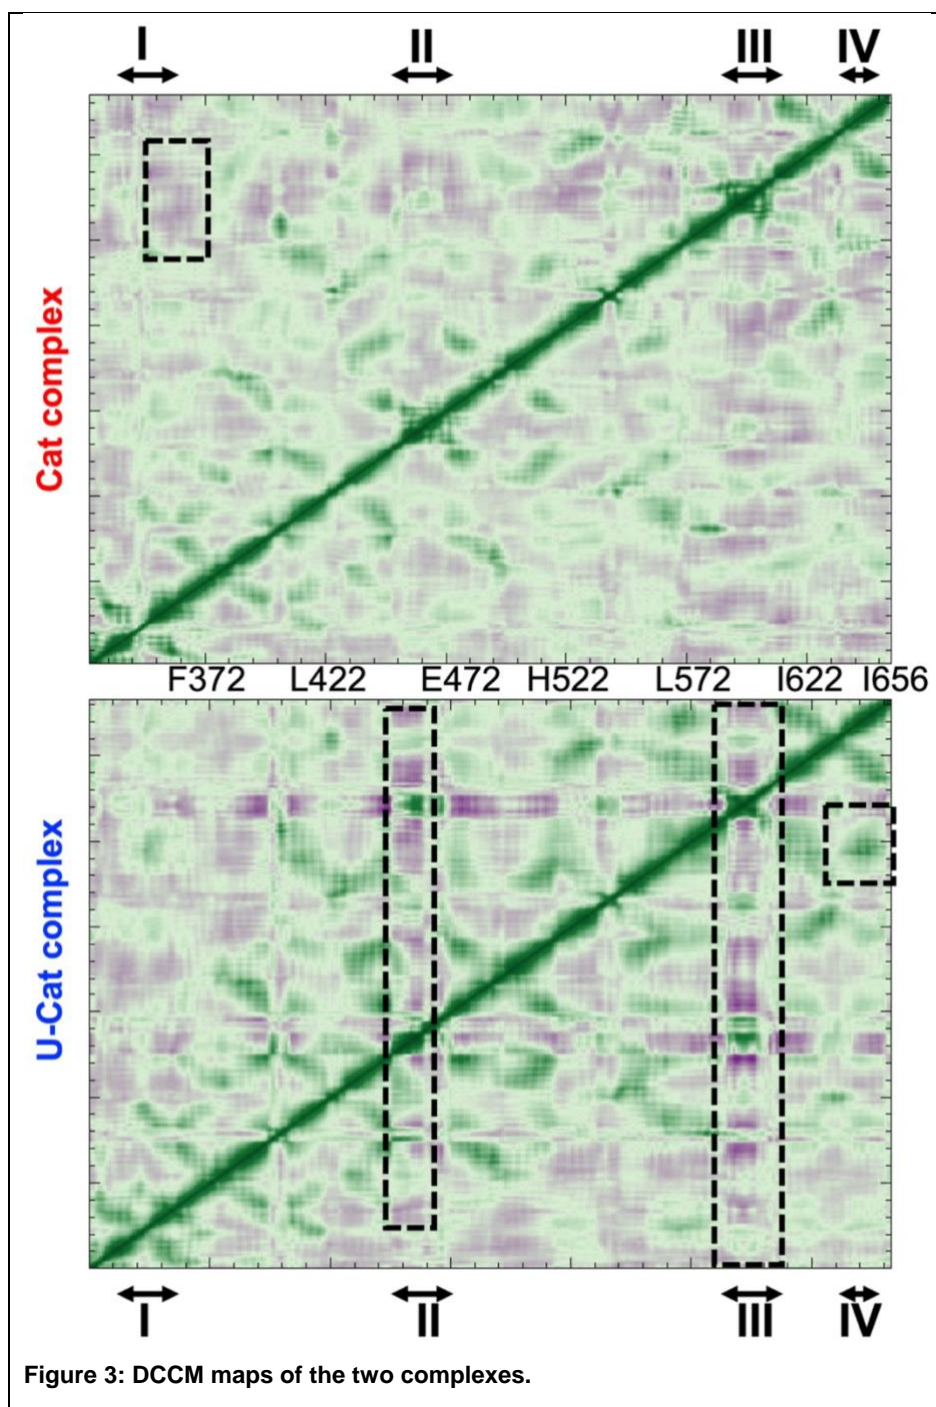

Figure 3: DCCM maps of the two complexes.

300

301 Based on the locations of these four regions to **UCR2-domain**, we hypothesized that  
302 UCR2-domain might affect the associated motion of the catalytic domain of PDE4B  
303 and sought to perform the dynamical cross-correlation matrix analysis.

304

### 305 **3.2.2 DCCM**

306 To understand the variation in the RMSF values of the two complexes and to check if  
307 motions in different regions (I-IV) are related or not, we performed an inter-residue  
308 DCCM analysis for C $\alpha$  atoms to find out the extent of correlation of atomic movements  
309 (**Fig. 3**). To compare the two complex structures, **U-Cat** and **Cat**, we only considered  
310 the catalytic (**Cat**) residues in the two complexes to perform the DCCM analysis.  
311 Similar diagonal trends in the two figures suggested that the UCR2-domain had a  
312 severe effect on the secondary structure of the two complexes suggesting that the two  
313 systems, **U-Cat** and **Cat**, may have similar global dynamics. Further, the darker  
314 shades of colors in the **U-Cat** complex suggested that the presence of additional  
315 UCR2-domain caused a greater extent of correlative (green) and anticorrelated  
316 (purple) motions in PDE4B-NPV complex. In particular, we observed intense purple  
317 shades in regions II and III of the **U-Cat** complex suggesting more substantial  
318 anticorrelated motions in these regions. Intriguingly, these anti-correlative motions in  
319 regions II and III were correlated with low RMSF values in these regions (**Fig. 2 and**  
320 **3**). On the contrary, the region I and IV showed enhanced correlative motion in the  
321 presence of UCR2-domain in the **U-Cat** complex. In conclusion, the darker shades  
322 plausibly suggest the enhanced associated motion U-Cat complex. Furthermore, low  
323 RMSF values and enhanced anticorrelated motion in regions II and III suggest that the  
324 presence of the UCR2 domain stabilizes the PDE4B-inhibitor complex through  
325 enhanced anticorrelated motion (**Fig. 2 and 3**). Interestingly, these results were in line  
326 with the energetics of the two systems because, in our MM-GBSA analysis, we  
327 observed the U-Cat complex's enhanced stability compared to the Cat-complex  
328 (**Supplementary data**).

329

### 330 **3.2.3 PCA**

331 Through the DCCM study, we confirmed that the presence of UCR2-domain affected  
332 the correlative (and anti-correlative) motions in PDE4B-NPV complex. To understand  
333 the directionality of these motions, we proceeded further and performed a PCA of the  
334 two simulations (**U-Cat** and **Cat**). Here, we designated the whole average of receptor

335 motion based on C $\alpha$  atoms. This approach supported to figure out the overall  
336 combined motion of the C $\alpha$  atoms in the protein denoted by the eigenvectors of the  
337 covariance matrix, which is asserted by its coincident eigenvalues (Amadei, Linssen  
338 & Berendsen 1993). The occurrence of the eigenvectors associated with large  
339 eigenvalues can generally represent the over-all concerted motion of the protein  
340 correlated to the protein function. The increasing sum of eigenvalues as a function of  
341 the number of eigenvalues resulting from the MD simulation frames during 0.1 $\mu$ s is  
342 shown in (**Fig. 4A**). To compare the two complexes, we ruled out additional residues  
343 of UCR2-domain in **U-Cat**. We observed that the first two components of the analysis,  
344 PC1, and PC2 were significantly higher for the **U-Cat** complex than the **Cat** complex,  
345 suggesting that the additional UCR2-domain enhanced the directional motion at the  
346 catalytic domain of PDE4B. **Fig. 4B** shows the domains, directions, and degrees of  
347 motions corresponding to the first three PCs of each complex. In all three projections,  
348 **the U-Cat** complex occupied a broad range of phase spaces as compared to **the Cat**  
349 complex. An increase in the collective motions of **U-Cat** may plausible enhanced  
350 interaction and thus the stability of the complex as compared to **Cat** complex. We next  
351 studied directionality and magnitudes of the three PCs using porcupine plots. The  
352 changes in direction and magnitude of **U-Cat** suggested that the additional UCR2-  
353 domain posed a significant conformational impact on the overall dynamics of PDE4B.  
354 We found that PC1 and PC2 motions were confined to regions Phe587-Ser610 and  
355 Asp447-Asp472 in the **Cat** complex. On the contrary, the motion in the active site  
356 region decreases in the **U-Cat** complex suggesting that the additional UCR2-domain  
357 indeed stabilizes the catalytic cavity region in PDE4B (**Figure 4**).

358

359 To conclude, our RMSF, DCCM, and PCA results suggested that the presence of  
360 UCR2-domain affected the dynamics of the catalytic domain of PDE4B. Interestingly,  
361 region II and III that showed enhanced anticorrelated motions and reduced RMSF at  
362 the active site region. On the contrary, the region I and IV that showed enhanced  
363 correlative motion and larger RMSF values, but they were distant from the active site  
364 region. Therefore, the additional domain UCR2-domain enhances the anti-correlative  
365 motion at the active site cavity and thus stabilized the protein-inhibitor interactions.

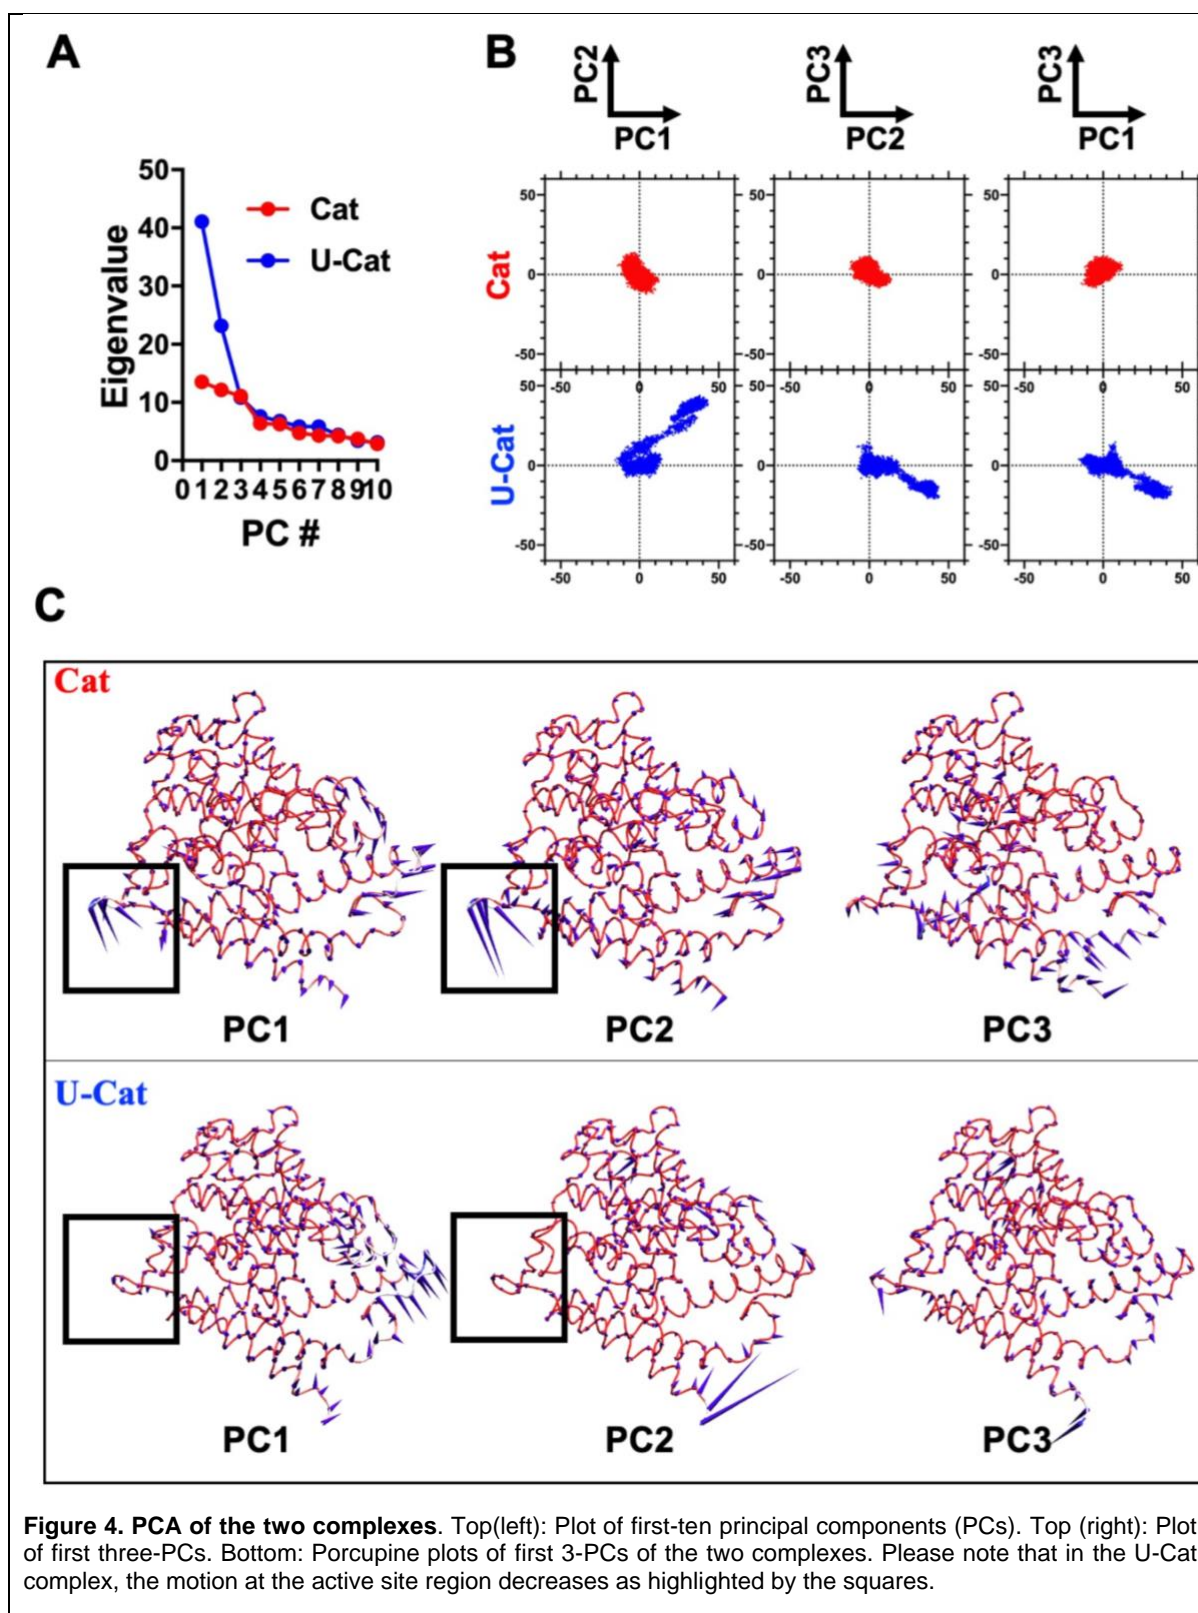

**Figure 4. PCA of the two complexes.** Top(left): Plot of first-ten principal components (PCs). Top (right): Plot of first three-PCs. Bottom: Porcupine plots of first 3-PCs of the two complexes. Please note that in the U-Cat complex, the motion at the active site region decreases as highlighted by the squares.

366

### 367 **3.2.4 Secondary structure analysis**

368 Further, to visualize critical changes in the protein conformation during the timeline

369 analysis, we performed a secondary structure analysis of the two simulations. We

370 generated a two-dimensional plot secondary structure information for the 100ns  
371 trajectory (**Fig. 5**). We observed that region Ser423-Asp433, which was a turn in the  
372 **U-Cat** complex, changed to a 3-turn helix in the **Cat** complex (brown to green). Further,  
373 we observed a local structural transition at the region Glu343–Phe353 that was a turn  
374 in the **Cat** complex but transformed into a coil in the presence of the UCR2-domain in  
375 the **U-Cat** complex, shown as green to red transition in **Fig. 5**. We observed a similar  
376 transition at the region Thr535-Thr550 that turned from a coil in the **Cat** complex to an  
377 anti-parallel beta-sheet in **the U-Cat** complex as seen a transition from red to blue  
378 color in the **Fig. 5**. Intriguingly, these differences in the secondary structure were in  
379 agreement with the RMSF and DCCM analyses and thus suggested the flexible  
380 residues.

381

### 382 **3.3 The dynamics of the active site region**

383 To further understand the effect of additional UCR2-domain on the catalytic domain of  
384 PDE4B, we studied the dynamics of the active site region in detail. At first, we  
385 assessed the stability of an H-bond with Gln615, an interaction reported in the crystal  
386 structure. We observed a stable H-bond with Gln615 in both the simulations, **U-Cat**,  
387 and **Cat** complexes. Further, we observed an enhanced occupancy of 65% of Gln615-  
388 H-bond in the **U-Cat** complex compared to 43% observed in **the Cat** complex,  
389 suggesting that the additional UCR2-domain indeed stabilizes the PDE4B-inhibitor  
390 interactions.

391 Furthermore, we observed an additional H-bond with Tyr274 (occupancy 25%) in **the**  
392 **U-Cat** complex, which was otherwise absent in the simulation of the **Cat** complex.  
393 Next, we studied the dynamics of the other plausible H-bonding residues in the active  
394 site cavity (Sharma & Wakode 2017). These residues include Tyr274, Tyr405, His406,  
395 His410, Tyr415, Asp447, Asp564, Asn567, and Gln615. We observed that these  
396 plausible H-bonding residues were more stable in the **U-Cat** complex as compared to  
397 **the Cat** complex as interpreted by lower RMSD values.

398 In addition to H-bonding residues,  $\pi$ - $\pi$  interactions with Phe618, Phe586, Tyr405, and  
399 Tyr274 were stable and consistent with the interactions reported in the crystal  
400 structures (**Fig. 6**). To this end, the MM-GBSA analysis also confirmed the enhanced  
401 stability of the **U-Cat** complex as compared to the **Cat-complex** (**Supplementary**  
402 **data**).

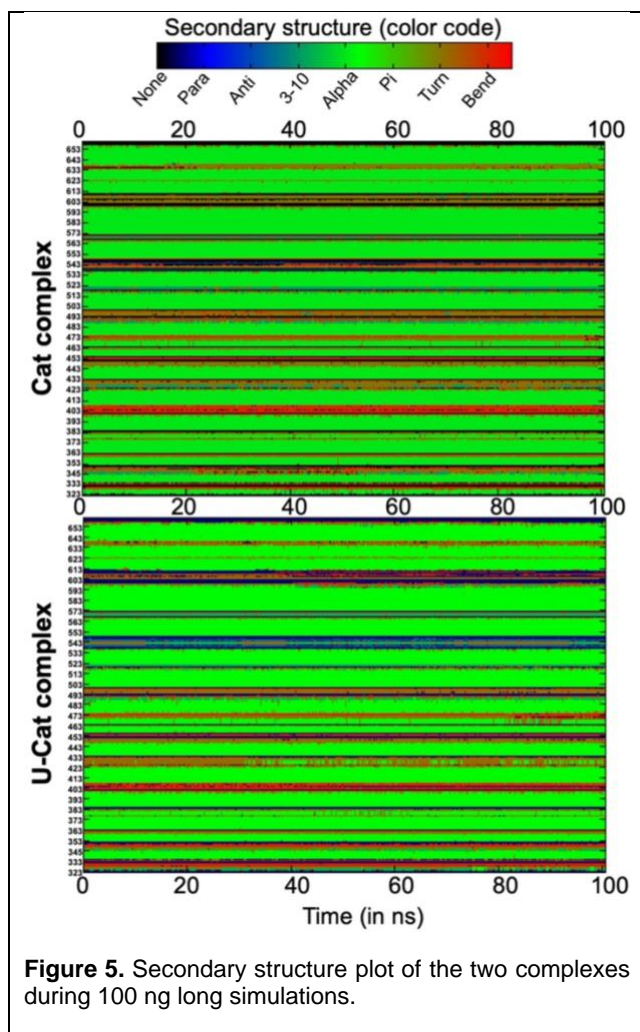

403

404

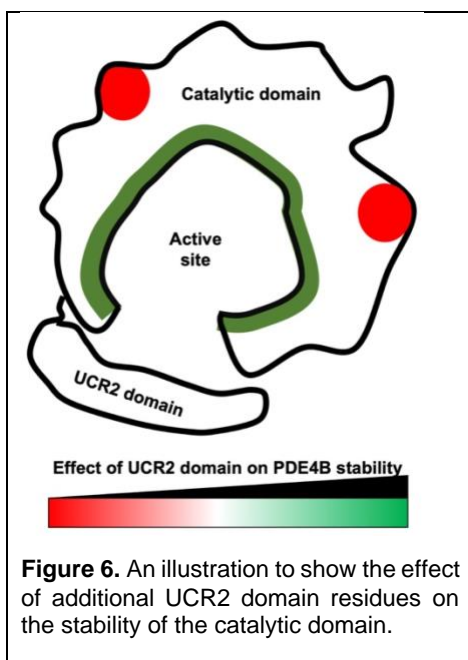

405



406 Altogether, our simulations and post-trajectory analyses confirm that the additional  
407 UCR2-domain stabilizes the PDE4B-inhibitor complexes and therefore, must be  
408 considered while evaluating the binding stability of newly designed PDE4B inhibitors.

409

#### 410 **4. Conclusion**

411 We performed 100 ns long molecular dynamics simulations of PDE4B variants, with  
412 and without the UCR2-domain. Both complexes with a common inhibitor, NPV, and  
413 probed the effect of additional UCR2-domain on the stability of PDE4B-NPV  
414 interactions. RMSF, DCCM, PCA, H-bond network analyses confirm that the UCR2-  
415 domain enhances the correlation and anticorrelation motion in the complex structure.  
416 This study provides substantial evidence to include the regulatory UCR2-domain in  
417 further drug designing to evaluate the stability of newly designed PDE4B inhibitors.

418

#### 419 **List of abbreviations**

|     |       |                                                        |
|-----|-------|--------------------------------------------------------|
| 420 | PDE4B | Phosphodiesterase 4B                                   |
| 421 | cAMP  | Cyclic adenosine monophosphate                         |
| 422 | COPD  | Chronic obstructive pulmonary disease                  |
| 423 | PDB   | Protein data bank                                      |
| 424 | MD    | Molecular dynamics                                     |
| 425 | RMSD  | Root mean square deviation                             |
| 426 | RMSF  | Root mean square fluctuation                           |
| 427 | DCCM  | dynamical cross-correlation matrix DCCM                |
| 428 | PCA   | Principal component analysis                           |
| 429 | U-cat | PDE 4B structure containing UCR2, and catalytic domain |
| 430 | Cat   | PDE 4B structure containing the catalytic domain       |

431

#### 432 **Funding**

433 The authors are indebted to the Department of Science and Technology (DST), India,  
434 for providing financial assistance to carry out this project [grant number SB/FT/CS-  
435 013/2012].

436

437  
438

## Conflict of interest

439 The authors declare no conflict of interest.

440

## References

- 442 Amadei, A., Linssen, A. B. & Berendsen, H. J. (1993). Essential dynamics of proteins. *Proteins*  
443 17: 412-425.
- 444 Amir, M., Ahamad, S., Mohammad, T., Jairajpuri, D. S., Hasan, G. M., Dohare, R., Islam, A.,  
445 Ahmad, F. & Hassan, M. I. (2019). Investigation of conformational dynamics of  
446 Tyr89Cys mutation in protection of telomeres 1 gene associated with familial  
447 melanoma. *J Biomol Struct Dyn*: 1-10.
- 448 Anjana, R., Vaishnavi, M. K., Sherlin, D., Kumar, S. P., Naveen, K., Kanth, P. S. & Sekar, K.  
449 (2012). Aromatic-aromatic interactions in structures of proteins and protein-DNA  
450 complexes: a study based on orientation and distance. *Bioinformation* 8: 1220-1224.
- 451 Berman, H. M., Westbrook, J., Feng, Z., Gilliland, G., Bhat, T. N., Weissig, H., Shindyalov, I.  
452 N. & Bourne, P. E. (2000). The protein data bank. *Nucleic acids research* 28: 235-242.
- 453 Calverley, P. M., Rabe, K. F., Goehring, U. M., Kristiansen, S., Fabbri, L. M. & Martinez, F.  
454 J. (2009). Roflumilast in symptomatic chronic obstructive pulmonary disease: two  
455 randomised clinical trials. *Lancet* 374: 685-694.
- 456 Case, D. A., Cheatham, T. E., 3rd, Darden, T., Gohlke, H., Luo, R., Merz, K. M., Jr., Onufriev,  
457 A., Simmerling, C., Wang, B. & Woods, R. J. (2005). The Amber biomolecular  
458 simulation programs. *J Comput Chem* 26: 1668-1688.
- 459 Darden, T., York, D. & Pedersen, L. (1993). Particle mesh Ewald: An N·log(N) method for  
460 Ewald sums in large systems.
- 461 Douglas, R. G., Nandekar, P., Aktories, J. E., Kumar, H., Weber, R., Sattler, J. M., Singer, M.,  
462 Lepper, S., Sadiq, S. K., Wade, R. C. & Frischknecht, F. (2018). Inter-subunit  
463 interactions drive divergent dynamics in mammalian and Plasmodium actin filaments.  
464 *PLoS Biol* 16: e2005345.
- 465 Elfiky, A. A. (2020). SARS-CoV-2 RNA dependent RNA polymerase (RdRp) targeting: an in  
466 silico perspective. *J Biomol Struct Dyn*: 1-9.
- 467 Fatima, S., Mohammad, T., Jairajpuri, D. S., Rehman, M. T., Hussain, A., Samim, M., Ahmad,  
468 F. J., Alajmi, M. F. & Hassan, M. I. (2019). Identification and evaluation of glutathione  
469 conjugate gamma-l-glutamyl-l-cysteine for improved drug delivery to the brain. *J*  
470 *Biomol Struct Dyn*: 1-11.
- 471 Goto, T., Shiina, A., Murata, T., Tomii, M., Yamazaki, T., Yoshida, K., Yoshino, T., Suzuki,  
472 O., Sogawa, Y., Mizukami, K., Takagi, N., Yoshitomi, T., Etori, M., Tsuchida, H.,  
473 Mikkaichi, T., Nakao, N., Takahashi, M., Takahashi, H. & Sasaki, S. (2014).  
474 Identification of the 5,5-dioxo-7,8-dihydro-6H-thiopyrano[3,2-d]pyrimidine  
475 derivatives as highly selective PDE4B inhibitors. *Bioorg Med Chem Lett* 24: 893-899.
- 476 Gotz, A. W., Williamson, M. J., Xu, D., Poole, D., Le Grand, S. & Walker, R. C. (2012).  
477 Routine Microsecond Molecular Dynamics Simulations with AMBER on GPUs. 1.  
478 Generalized Born. *J Chem Theory Comput* 8: 1542-1555.
- 479 Gunsteren, W. F. v. & Berendsen, H. J. C. (2006). Algorithms for macromolecular dynamics  
480 and constraint dynamics. <http://dx.doi.org/10.1080/00268977700102571>.
- 481 Hornak, V., Abel, R., Okur, A., Strockbine, B., Roitberg, A. & Simmerling, C. (2006).  
482 Comparison of multiple Amber force fields and development of improved protein  
483 backbone parameters. *Proteins* 65: 712-725.

- 484 Houslay, M. D. & Adams, D. R. (2003). PDE4 cAMP phosphodiesterases: modular enzymes  
485 that orchestrate signalling cross-talk, desensitization and compartmentalization.  
486 *Biochem J* 370: 1-18.
- 487 Humphrey, W., Dalke, A. & Schulten, K. (1996). VMD: visual molecular dynamics. *J Mol*  
488 *Graph* 14: 33-38, 27-38.
- 489 Islam, R., Parves, R., Paul, A. S., Uddin, N., Rahman, M. S., Mamun, A. A., Hossain, M. N.,  
490 Ali, M. A. & Halim, M. A. (2020). A Molecular Modeling Approach to Identify  
491 Effective Antiviral Phytochemicals against the Main Protease of SARS-CoV-2. *J*  
492 *Biomol Struct Dyn*: 1-20.
- 493 Kiss, P. T. & Baranyai, A. (2011). Sources of the deficiencies in the popular SPC/E and TIP3P  
494 models of water. *J Chem Phys* 134: 054106.
- 495 Kumar, D., Kumari, K., Jayaraj, A., Kumar, V., Kumar, R. V., Dass, S. K., Chandra, R. &  
496 Singh, P. (2020). Understanding the binding affinity of nospapines with protease of  
497 SARS-CoV-2 for COVID-19 using MD simulations at different temperatures. *J Biomol*  
498 *Struct Dyn*: 1-14.
- 499 Li, J., Zhou, N., Liu, W., Feng, Y., Wang, X., Wu, C. & Bao, J. (2016). Discover natural  
500 compounds as potential phosphodiesterase-4B inhibitors via computational  
501 approaches. *J Biomol Struct Dyn* 34: 1101-1112.
- 502 Lobanov, M., Bogatyreva, N. S. & Galzitskaia, O. V. (2008). [Radius of gyration is indicator  
503 of compactness of protein structure]. *Mol Biol (Mosk)* 42: 701-706.
- 504 McCammon, A. J. & Harvey, S. C. (1988). *Dynamics of Proteins and Nucleic Acids*.  
505 Cambridge University Press.
- 506 Moreau, C. A., Bhargav, S. P., Kumar, H., Quadt, K. A., Piirainen, H., Strauss, L., Kehrer, J.,  
507 Streichfuss, M., Spatz, J. P., Wade, R. C., Kursula, I. & Frischknecht, F. (2017). A  
508 unique profilin-actin interface is important for malaria parasite motility. *PLoS Pathog*  
509 *13*: e1006412.
- 510 Padhi, A. K., Kumar, H., Vasaikar, S. V., Jayaram, B. & Gomes, J. (2012). Mechanisms of loss  
511 of functions of human angiogenin variants implicated in amyotrophic lateral sclerosis.  
512 *PLoS One* 7: e32479.
- 513 Rocque, W. J., Tian, G., Wiseman, J. S., Holmes, W. D., Zajac-Thompson, I., Willard, D. H.,  
514 Patel, I. R., Wisely, G. B., Clay, W. C., Kadwell, S. H., Hoffman, C. R. & Luther, M.  
515 A. (1997). Human recombinant phosphodiesterase 4B2B binds (R)-rolipram at a single  
516 site with two affinities. *Biochemistry* 36: 14250-14261.
- 517 Saldou, N., Obernolte, R., Huber, A., Baecker, P. A., Wilhelm, R., Alvarez, R., Li, B., Xia, L.,  
518 Callan, O., Su, C., Jarnagin, K. & Shelton, E. R. (1998). Comparison of recombinant  
519 human PDE4 isoforms: interaction with substrate and inhibitors. *Cell Signal* 10: 427-  
520 440.
- 521 Santos, J. M., Egarter, S., Zuzarte-Luis, V., Kumar, H., Moreau, C. A., Kehrer, J., Pinto, A.,  
522 Costa, M. D., Franke-Fayard, B., Janse, C. J., Frischknecht, F. & Mair, G. R. (2017).  
523 Malaria parasite LIMP protein regulates sporozoite gliding motility and infectivity in  
524 mosquito and mammalian hosts. *Elife* 6.
- 525 Sastry, G. M., Adzhigirey, M., Day, T., Annabhimoju, R. & Sherman, W. (2013). Protein and  
526 ligand preparation: parameters, protocols, and influence on virtual screening  
527 enrichments. *J Comput Aided Mol Des* 27: 221-234.
- 528 Sharma, V. & Wakode, S. (2016). Pharmacophore generation and atom based 3D-QSAR of  
529 quinoline derivatives as selective phosphodiesterase 4B inhibitors. *RSC Advances* 6:  
530 75805-75819.
- 531 Sharma, V. & Wakode, S. (2017). Structural insight into selective phosphodiesterase 4B  
532 inhibitors: pharmacophore-based virtual screening, docking, and molecular dynamics  
533 simulations. *J Biomol Struct Dyn* 35: 1339-1349.

- 534 Stote, R. H. & Karplus, M. (1995). Zinc binding in proteins and solution: a simple but accurate  
535 nonbonded representation. *Proteins* 23: 12-31.
- 536 Tautermann, C. S., Seeliger, D. & Kriegl, J. M. (2015). What can we learn from molecular  
537 dynamics simulations for GPCR drug design? *Comput Struct Biotechnol J* 13: 111-121.
- 538 Wang, J., Wolf, R. M., Caldwell, J. W., Kollman, P. A. & Case, D. A. (2004). Development  
539 and testing of a general amber force field. *J Comput Chem* 25: 1157-1174.
- 540 Wang, P., Myers, J. G., Wu, P., Cheewatrakoolpong, B., Egan, R. W. & Billah, M. M. (1997).  
541 Expression, purification, and characterization of human cAMP-specific  
542 phosphodiesterase (PDE4) subtypes A, B, C, and D. *Biochem Biophys Res Commun*  
543 234: 320-324.
- 544 Xiao, F., Yang, M., Xu, Y. & Vongsangnak, W. (2015). Comparisons of Prostate Cancer  
545 Inhibitors Abiraterone and TOK-001 Binding with CYP17A1 through Molecular  
546 Dynamics. *Comput Struct Biotechnol J* 13: 520-527.
- 547 Xing, M., Akowuah, G. A., Gautam, V. & Gaurav, A. (2017). Structure-based design of  
548 selective phosphodiesterase 4B inhibitors based on ginger phenolic compounds. *J*  
549 *Biomol Struct Dyn* 35: 2910-2924.
- 550 Zhang, K. Y., Ibrahim, P. N., Gillette, S. & Bollag, G. (2005). Phosphodiesterase-4 as a  
551 potential drug target. *Expert Opinion on Therapeutic Targets*.
- 552
